# Supplementary material for: Enhanced zinc reversibility enabled by zinc–bromide complexation of a quasi-solid electrolyte for high-performance flexible zinc–air batteries
Source: Royal Society of Chemistry journal article supplement (doi:10.1039/d4ta00160e), 2024-01-01
Supplement: d4ta00160e1.pdf [file d4ta00160e1.pdf]

## Supporting Information

### **Enhanced zinc reversibility enabled by zinc-bromide complexation of quasi-solid electrolyte for high-performance flexible zinc-air batteries**

Zunhong Chen, Junhong Jin, Shenglin Yang, Guang Li\*, Jingjing Zhang\*

State Key Laboratory for Modification of Chemical Fibers and Polymer Materials,  
College of Materials Science and Engineering, Donghua University, Shanghai, 201620,  
China.

\*E-mail: lig@dhu.edu.cn, jjzhang1@dhu.edu.cn

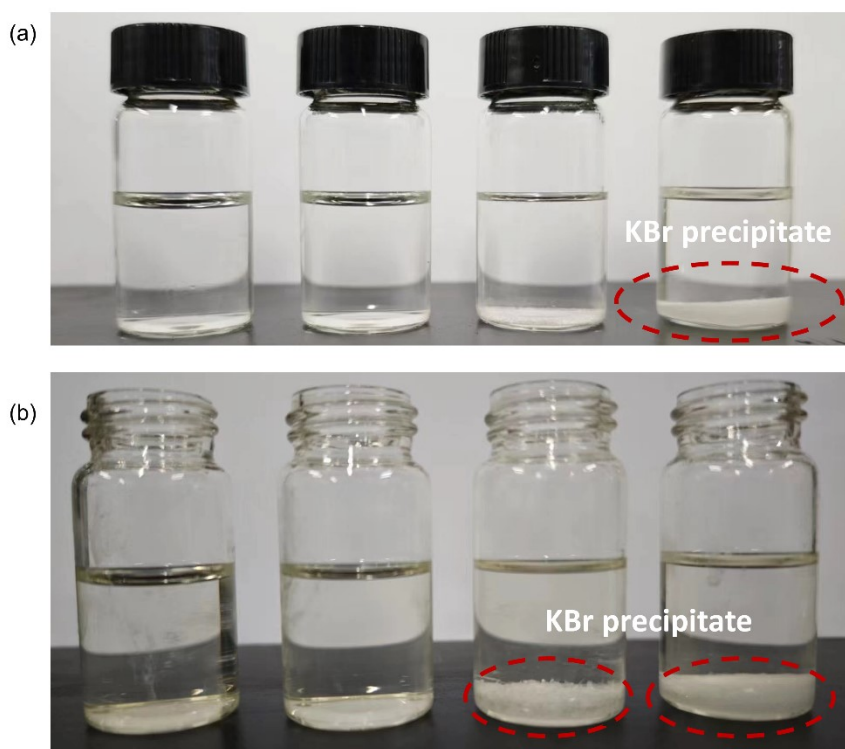

Figure S1. Optical images of solubility of 6 M KOH + 0.2 M ZnAc<sub>2</sub>, 6 M KOH + 0.2 M Zn(CH<sub>3</sub>COO)<sub>2</sub> + 1 M KBr, 6 M KOH + 0.2 M Zn(CH<sub>3</sub>COO)<sub>2</sub> + 1.5 M KBr and 6 M KOH + 0.2 M Zn(CH<sub>3</sub>COO)<sub>2</sub> + 2 M KBr (from left to right).

Different concentrations of KBr were added to 6 M KOH + 0.2 M Zn(CH<sub>3</sub>COO)<sub>2</sub> to investigate its solubility. As shown in Figure S1a, the electrolyte is saturated with 1.5-2 M KBr. Theoretically, the higher content of KBr is favorable for the formation of more Zn-Br complexes. However, when the electrolytes were held in the ambient environment for 48 h, the KBr precipitates for the samples with 1.5 and 2 M KBr with the volatilization of water (Figure S1b). Considering the inevitable water loss of QSEs in the half-open structure of FZABs, the precipitation of KBr in the saturated electrolyte probably happens, diminishing the interfacial stability between the electrolyte and electrode. Therefore, the addition of 1 M KBr was chosen.

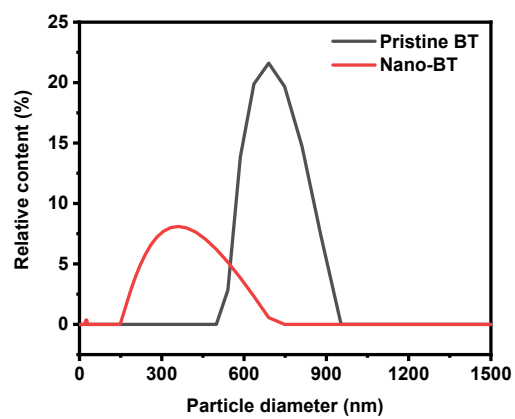

Figure S2. The particle size distribution curves of nano-BT and pristine BT.

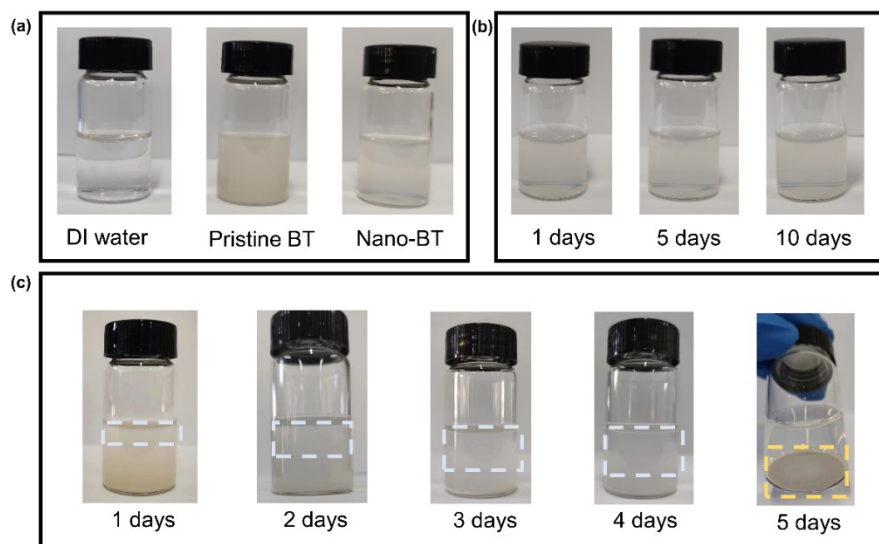

Figure S3. (a) Optical images of DI water, pristine BT and nano-BT. Optical images of (b) nano-BT with a standing time of 1, 5 and 10 days, and (c) pristine BT with a standing time of 1, 2, 3, 4 and 5 days, respectively.

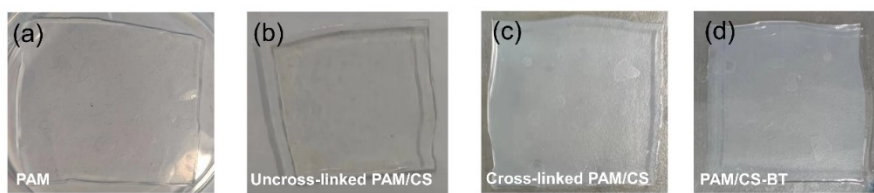

Figure S4. Optical images of (a) PAM hydrogel, (b) uncross-linked PAM/CS hydrogel, (c) cross-linked PAM/CS hydrogel, and (d) PAM/CS-BT hydrogel.

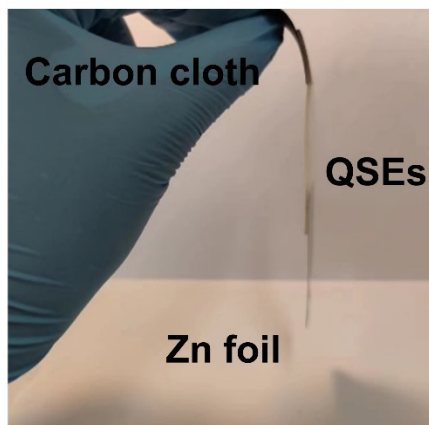

### **Electrode adhesion**

Figure S5. Optical image of adhesion of PAM/CS-BT to Zn and air electrodes.

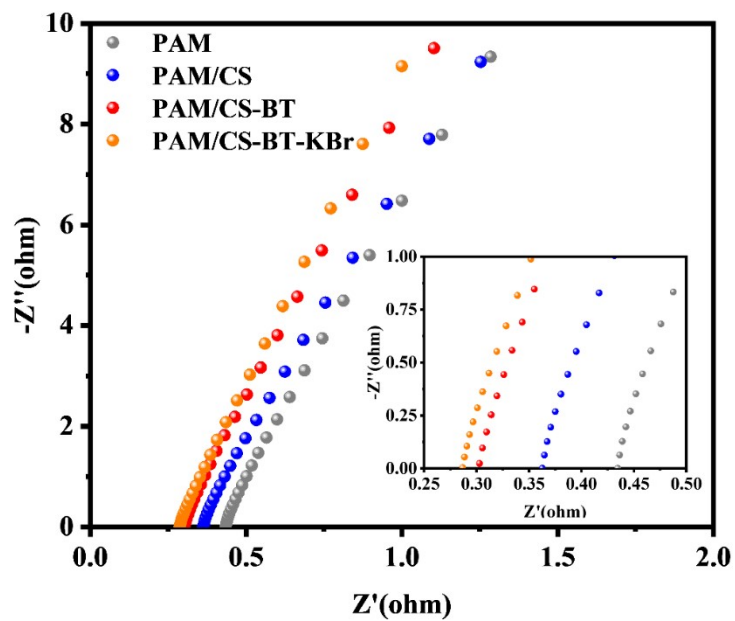

Figure S6. AC impedance diagram of different QSEs tested after sufficient electrolyte swelling.

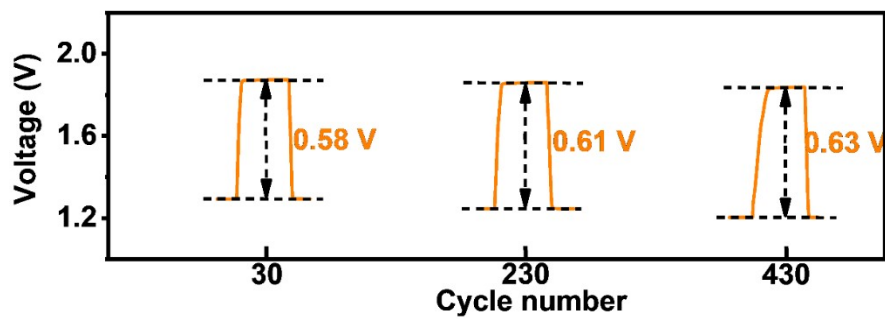

Figure S7. Voltage hysteresis cycle test of FZABs with PAM/CS-BT-KBr QEs at 2 mA cm<sup>-2</sup>.



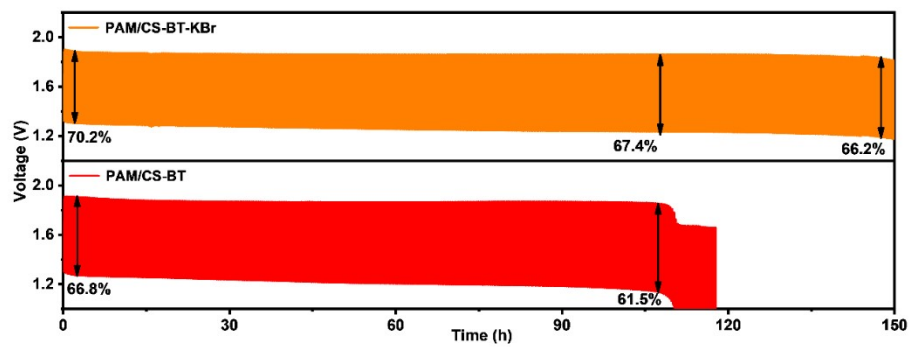

Figure S8. Galvanostatic discharge/charge curves of FZABs with PAM/CS-BT and PAM/CS-BT-KBr QSEs at  $2 \text{ mA cm}^{-2}$ .

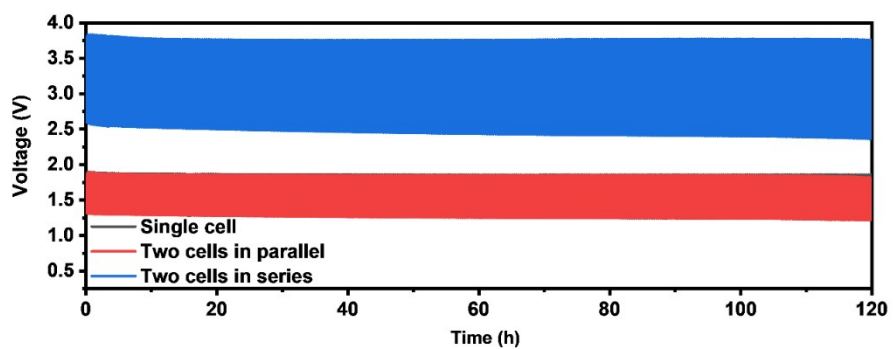

Figure S9. Galvanostatic discharge/charge curves of one cell, two cells in series and two cells in parallel with PAM/CS-BT-KBr QSEs at  $2 \text{ mA cm}^{-2}$ .

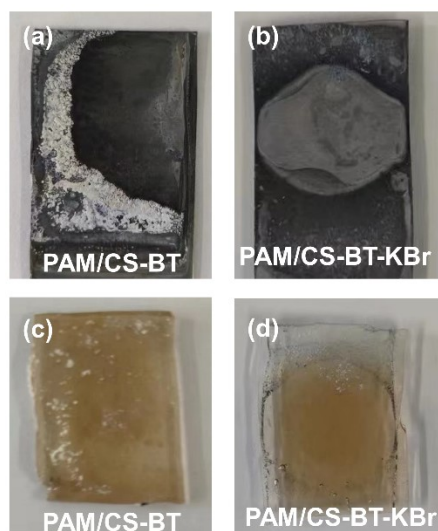

Figure S10. (a, b) Optical images of cycled Zn anodes from PAM/CS-BT-based and PAM/CS-BT-KBr-based FZABs, respectively. (c, d) Optical images of cycled PAM/CS-BT and PAM/CS-BT-KBr electrolytes.

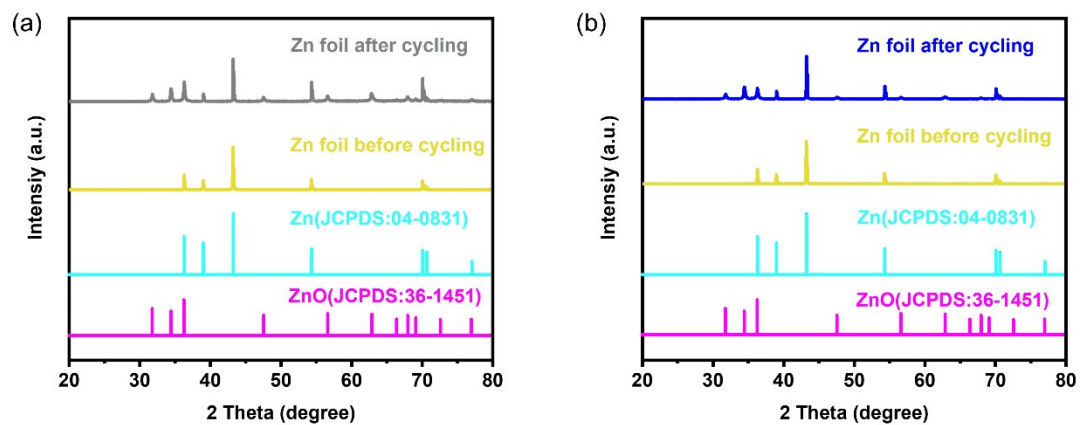

Figure S11. XRD patterns of the initial and cycled Zn anodes using (a) PAM and (b) PAM/CS electrolytes.

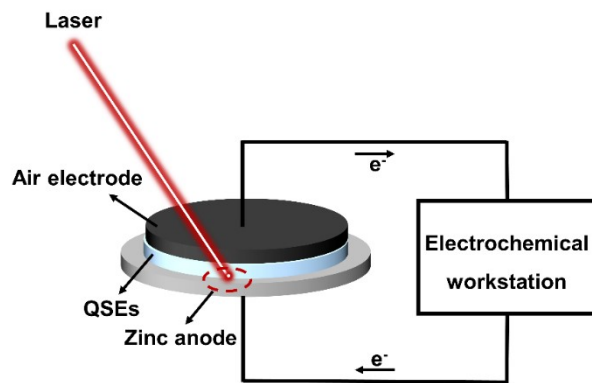

Figure S12. Schematic diagram of in-situ Raman spectroscopy testing.

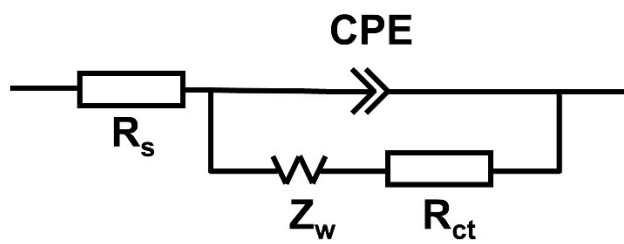

Figure S13. The equivalent circuit used to fit the Nyquist plots.

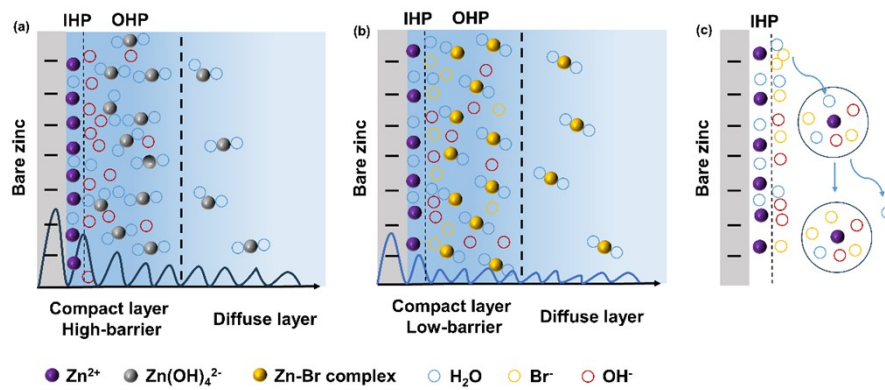

Figure S14. Electric double layer structure in the vicinity of anode and the corresponding energy barrier of (a) PAM/CS-BT and (b,c) PAM/CS-BT-KBr electrolytes.

Table S1. Comparative summary of open-circuit voltage and power density of PAM/CS-BT-KBr-based FZABs in this work and other reported studies on QSEs.

| Electrolyte                | Catalyst                                                                       | Open-circuit voltage (V) | Power density (mW cm <sup>-2</sup> ) | Ref       |
|----------------------------|--------------------------------------------------------------------------------|--------------------------|--------------------------------------|-----------|
| PAM/CS-BT-KBr              | Pt/C+RuO <sub>2</sub><br>(0.5 mg cm <sup>-2</sup> )                            | 1.48                     | 153.3                                | This work |
| PVA-0.075TMG<br>3 M KOH    | Co <sub>3</sub> O <sub>4</sub> /carbon<br>paper                                | 1.3                      | 84.1                                 | 1         |
| PAA<br>30 wt% KOH          | Pt/C+RuO <sub>2</sub>                                                          | /                        | ~120                                 | 2         |
|                            | BFC-FC-0.2                                                                     | 1.49                     | 160                                  |           |
| PVAA-cellulose<br>6 M KOH  | CoFeP@C<br>(1 mg cm <sup>-2</sup> )                                            | 1.41                     | 74                                   | 3         |
| BC-4 M KOH-2 M KI          | Pt/C+RuO <sub>2</sub>                                                          | 1.34                     | 129                                  | 4         |
| PAMPS-K25-<br>MC2.0-5M     | Co <sub>3</sub> O <sub>4</sub> /carbon<br>black                                | ~1.35                    | 73.9                                 | 5         |
| PAMNa-CMCS<br>6 M KOH      | Pt/C+RuO <sub>2</sub><br>(2 mg cm <sup>-2</sup> )                              | 1.4                      | 120.87                               | 6         |
| PAM-PAA-6 M KOH            | Pt/C+RuO <sub>2</sub><br>(1 mg cm <sup>-2</sup> )                              | 1.42                     | 11.8                                 | 7         |
| PANa-St                    | Pt/C+RuO <sub>2</sub><br>(2 mg cm <sup>-2</sup> )                              | 1.40                     | 67.5                                 | 8         |
| PU-PES-fiber<br>6 M KOH    | /                                                                              | 1.4                      | 68.7                                 | 9         |
| HP-PVA/PAA<br>6 M KOH      | Pt/C+RuO <sub>2</sub><br>(0.4 mg cm <sup>-2</sup> )                            | 1.415                    | 70.5                                 | 10        |
| PAM-CNF/KOH/KI             | Pt/C+RuO <sub>2</sub><br>(2 mg cm <sup>-2</sup> )                              | 1.4                      | ~63                                  | 11        |
| PAAK-M                     | /                                                                              | /                        | 126                                  | 12        |
| PAM-F/G                    | /                                                                              | 1.4                      | 155                                  | 13        |
| PAM-SA/PhCs                | Mn-Co-Fe@CNT                                                                   | 1.45                     | 87                                   | 14        |
| M-Agar-6 M KOH             | Mn-Co-<br>Fe@CNT/nickel<br>foam                                                | 1.46                     | 126                                  | 15        |
| C-HGE0.5                   | Co <sub>3</sub> O <sub>4</sub> /CNTs                                           | /                        | 62.2                                 | 16        |
| AEPEM-GF<br>6 M KOH        | Pt/C+RuO <sub>2</sub>                                                          | 1.45                     | 140                                  | 17        |
| TEAOH-KOH/PVA              | Co <sub>3</sub> O <sub>4</sub> /LIG                                            | 1.39                     | /                                    | 18        |
| CNF-<br>FHE(PANa/CNF)      | FeCo-ONS<br>(2.5 mg cm <sup>-2</sup> )                                         | 1.49                     | 30                                   | 19        |
| MXene/Zn-LDH-<br>array@PVA | Pt/C+RuO <sub>2</sub><br>(0.5 mg cm <sup>-2</sup> )                            | 1.37                     | 92.3                                 | 20        |
| PAMPS/PAM/DMS<br>O         | Co <sub>3</sub> O <sub>4</sub> /RuO <sub>2</sub><br>(0.2 mg cm <sup>-2</sup> ) | /                        | 56.8                                 | 21        |
| Agar-PVA/GO DN             | /                                                                              | /                        | 123.7                                | 22        |



|                           |                                                     |      |        |    |
|---------------------------|-----------------------------------------------------|------|--------|----|
| 6 M KOH                   |                                                     |      |        |    |
| Starch gel-KOH            | Mn-Co-Fe@CNT                                        | 1.43 | 84     | 23 |
| PAM/SA/KI                 | Pt/C+RuO <sub>2</sub><br>(1 mg cm <sup>-2</sup> )   | 1.43 | 132    | 24 |
| PANa/CNF                  | Co-N-Cs<br>(1 mg cm <sup>-2</sup> )                 | /    | 128    | 25 |
| HPPAN                     | CoN-CS<br>(1 mg cm <sup>-2</sup> )                  | 1.46 | 123.8  | 26 |
| ANF-PVA                   | Co/CNT<br>(0.4 mg cm <sup>-2</sup> )                | ~1.5 | 67.5   | 27 |
| HAcc@HPPAN-<br>COONa/PANa | Pt/C+RuO <sub>2</sub><br>(0.5 mg cm <sup>-2</sup> ) | 1.45 | 126    | 28 |
| PAM-SC                    | CoFe/AC                                             | 1.37 | 107.64 | 29 |

Table S2. Comparative summary of lifespan of PAM/CS-BT-KBr-based FZABs in this work and other reported studies on QSEs.

| Electrolyte               | Catalyst                                            | Current Density (mA cm <sup>-2</sup> ) | Lifespan            | Ref       |
|---------------------------|-----------------------------------------------------|----------------------------------------|---------------------|-----------|
| PAM/CS-BT-KBr             | Pt/C+RuO <sub>2</sub><br>(0.5 mg cm <sup>-2</sup> ) | 2                                      | 150 h<br>450 cycles | This work |
| PVA-0.075TMG<br>3 M KOH   | Co <sub>3</sub> O <sub>4</sub> /carbon<br>paper     | 5                                      | 16 h<br>100 cycles  | 1         |
| PAA<br>30 wt% KOH         | Pt/C+RuO <sub>2</sub>                               | 2                                      | 40 h<br>180 cycles  | 2         |
|                           | BFC-FC-0.2                                          |                                        | 105 h<br>600 cycles |           |
| PVAA-cellulose 6 M<br>KOH | CoFeP@C<br>(1 mg cm <sup>-2</sup> )                 | 3                                      | 54 h<br>324 cycles  | 3         |
| BC-4 M KOH-2 M KI         | Pt/C+RuO <sub>2</sub>                               | /                                      | 17 h<br>100 cycles  | 4         |
| PAMPS-K25-MC2.0-<br>5M    | Co <sub>3</sub> O <sub>4</sub> /carbon<br>black     | 1                                      | 70 h<br>210 cycles  | 5         |
| PAMNa-CMCS<br>6 M KOH     | Pt/C+RuO <sub>2</sub><br>(2 mg cm <sup>-2</sup> )   | 5                                      | 86 h                | 6         |
| PAM-PAA-6 M KOH           | Pt/C+RuO <sub>2</sub><br>(1 mg cm <sup>-2</sup> )   | 1                                      | 10 h<br>100 cycles  | 7         |
| PANa-St                   | Pt/C+RuO <sub>2</sub><br>(2 mg cm <sup>-2</sup> )   | /                                      | 44 h<br>132 cycles  | 8         |
| PU-PES-fiber<br>6 M KOH   | /                                                   | 1                                      | 5 h<br>30 cycles    | 9         |
| HP-PVA/PAA<br>6 M KOH     | Pt/C+RuO <sub>2</sub><br>(0.4 mg cm <sup>-2</sup> ) | 1                                      | 189 cycles          | 10        |
| PAM-CNF/KOH/KI            | Pt/C+RuO <sub>2</sub><br>(2 mg cm <sup>-2</sup> )   | 2                                      | 75 h<br>225 cycles  | 11        |
| PAAK-M                    | /                                                   | 2                                      | 55 h                | 12        |
| PAM-F/G                   | /                                                   | 2                                      | 40 h                | 13        |
| PAM-SA/PhCs               | Mn-Co-Fe@CNT                                        | 2                                      | 30 h<br>180 cycles  | 14        |
| M-Agar-6 M KOH            | Mn-Co-<br>Fe@CNT/nickel<br>foam                     | 2                                      | 25 h<br>75 cycles   | 15        |
| C-HGE0.5                  | Co <sub>3</sub> O <sub>4</sub> /CNTs                | 3                                      | 60 h<br>180 cycles  | 16        |
| AEPEM-GF<br>6 M KOH       | Pt/C+RuO <sub>2</sub>                               | 5                                      | 28 h<br>168 cycles  | 17        |
| TEAOH-KOH/PVA             | Co <sub>3</sub> O <sub>4</sub> /LIG                 | 0.5                                    | 20 h<br>133 cycles  | 18        |
| CNF-FHE(PANa/CNF)         | FeCo-ONS                                            | 1                                      | 85 h                | 19        |

|                           |                                                                                |     |                     |    |
|---------------------------|--------------------------------------------------------------------------------|-----|---------------------|----|
|                           | (2.5 mg cm <sup>-2</sup> )                                                     |     |                     |    |
| MXene/Zn-LDH-array@PVA    | Pt/C+RuO <sub>2</sub><br>(0.5 mg cm <sup>-2</sup> )                            | 3   | 50 h<br>100 cycles  | 20 |
| PAMPS/PAM/DMSO            | Co <sub>3</sub> O <sub>4</sub> /RuO <sub>2</sub><br>(0.2 mg cm <sup>-2</sup> ) | 1   | 59 h<br>177 cycles  | 21 |
| Agar-PVA/GO DN<br>6 M KOH | /                                                                              | 0.5 | 64 h<br>384 cycles  | 22 |
| Starch gel-KOH            | Mn-Co-Fe@CNT                                                                   | 2   | 36 h<br>200 cycles  | 23 |
| PAM/SA/KI                 | Pt/C+ RuO <sub>2</sub><br>(1 mg cm <sup>-2</sup> )                             | 1   | 110 h<br>330 cycles | 24 |
| PANa/CNF                  | Co-N-Cs<br>(1 mg cm <sup>-2</sup> )                                            | 2   | 110 h               | 25 |
| HPPAN                     | CoN-CS<br>(1 mg cm <sup>-2</sup> )                                             | 3   | 54 h<br>162 cycles  | 26 |
| ANF-PVA                   | Co/CNT<br>(0.4 mg cm <sup>-2</sup> )                                           | 1   | 118 h<br>355 cycles | 27 |
| HAcc@HPPAN-<br>COONa/PANa | Pt/C+RuO <sub>2</sub><br>(0.5 mg cm <sup>-2</sup> )                            | 2   | 100 h<br>300 cycles | 28 |
| PAM-SC                    | CoFe/AC                                                                        | 0.5 | 42 h<br>420 cycles  | 29 |

Table S3. Fitted charge transfer resistance ( $R_{ct}$ ) of FZABs with PAM/CS-BT and PAM/CS-BT-KBr electrolytes at different temperatures.

| Temperature (°C) | PAM/CS-BT             |                              | PAM/CS-BT-KBr         |                              |
|------------------|-----------------------|------------------------------|-----------------------|------------------------------|
|                  | $R_{ct}$ ( $\Omega$ ) | Relative standard errors (%) | $R_{ct}$ ( $\Omega$ ) | Relative standard errors (%) |
| 5                | 18.87                 | 6.59                         | 7.43                  | 3.95                         |
| 10               | 16.66                 | 7.88                         | 6.41                  | 4.62                         |
| 15               | 14.36                 | 7.67                         | 5.71                  | 5.54                         |
| 20               | 12.06                 | 7.99                         | 5.00                  | 6.10                         |
| 25               | 10.18                 | 8.52                         | 4.55                  | 7.65                         |

### Supplementary References

1. Zhou, Y. J.; Pan, J.; Ou, X.; Liu, Q. B.; Hu, Y.; Li, W. Z.; Wu, R. L.; Wen, J.; Yan, F. *Adv. Energy Mater.* **2021**, *11* (38), 12.
2. Pei, Z. X.; Yuan, Z. W.; Wang, C. J.; Zhao, S. L.; Fei, J. Y.; Wei, L.; Chen, J. S.; Wang, C.; Qi, R. J.; Liu, Z. W. *Angew. Chem.-Int. Edit.* **2020**, *59* (12), 4793-4799.
3. Li, W. M.; Wang, Y. X.; Liu, R. J.; Chen, W. D.; Zhang, H.; Zhang, Z. Y. *ACS Sustain. Chem. Eng.* **2023**, *8*.
4. Zhang, Y. A.; Chen, Y. J.; Li, X.; Alfred, M.; Li, D. W.; Huang, F. L.; Wei, Q. F. *J. Power Sources* **2021**, *482*, 7.
5. Sun, N.; Lu, F.; Yu, Y.; Su, L.; Gao, X. P.; Zheng, L. Q. *ACS Appl. Mater. Interfaces* **2020**, *12* (10), 11778-11788.
6. Shang, Z. H.; Zhang, H.; Qu, M. F.; Wang, R. T.; Wan, L.; Lei, D.; Li, Z. Z. *Chem. Eng. J.* **2023**, *468*, 13.
7. Chen, R.; Xu, X. B.; Peng, S. Y.; Chen, J. M.; Yu, D. F.; Xiao, C. H.; Li, Y. L.; Chen, Y. T.; Hu, X. F.; Liu, M. J. *ACS Sustain. Chem. Eng.* **2020**, *8* (31), 11501-11511.
8. Zhang, Y. A.; Chen, Y. J.; Alfred, M.; Huang, F. L.; Liao, S. Q.; Chen, D. S.; Li, D. W.; Wei, Q. F. *Compos. Pt. B-Eng.* **2021**, *224*, 8.
9. Zhang, P. F.; Wang, K. L.; Zuo, Y. Y.; Wei, M. H.; Pei, P. C.; Liu, J.; Wang, H. W.; Chen, Z.; Shang, N. *J. Power Sources* **2022**, *531*, 9.

10. Song, S. W.; Kim, H.; Shin, S.; Jang, S.; Bae, J. H.; Pang, C.; Choi, J.; Yoon, K. R. *Energy Storage Mater.* **2023**, *60*, 10.
11. Zhang, Y. N.; Qin, H. L.; Alfred, M.; Ke, H. Z.; Cai, Y. B.; Wang, Q. Q.; Huang, F. L.; Liu, B.; Lv, P. F.; Wei, Q. F. *Energy Storage Mater.* **2021**, *42*, 88-96.
12. Zhang, P. F.; Wang, K. L.; Zuo, Y. Y.; Wei, M. H.; Wang, H. W.; Chen, Z.; Shang, N.; Pei, P. C. *Chem. Eng. J.* **2023**, *451*, 10.
13. Zhang, P. F.; Wang, K. L.; Zuo, Y. Y.; Wei, M. H.; Wang, H. W.; Chen, Z.; Shang, N.; Pei, P. C. *ACS Appl. Mater. Interfaces*, 10.
14. Zuo, Y. Y.; Zhang, W. X.; Wei, M. H.; Zhang, P. F.; Zhao, S. Y.; Pei, P. C.; Qiu, L. L.; Wang, H. W.; Meng, Z. H.; Wang, K. L. *Energy Storage Mater.* **2022**, *53*, 136-147.
15. Zuo, Y. Y.; Wang, K. L.; Wei, M. H.; Zhang, P. F.; Zhao, S. Y.; Pei, P. C.; Wang, H. W.; Chen, Z.; Shang, N. *Chem. Eng. J.* **2023**, *452*, 9.
16. Li, Z. Y.; Li, X.; Jiang, Y. F.; Ding, Q. J.; Han, W. J. *Polymer Testing* **2021**, *104*, 10.
17. Kurian, M.; Vijayakumar, V.; Manna, N.; Kanheerampockil, F.; Bhat, S.; Kurungot, S. *J. Mater. Chem. A* **2023**, *11* (27), 14776-14787.
18. Chen, X.; Hou, Z. R.; Li, G. X.; Yu, W.; Xue, Y.; Niu, G. Y.; Xin, M. Y.; Yang, L.; Meng, C. Z.; Guo, S. J. *Nano Energy* **2022**, *101*, 11.
19. Xue, Y. C.; Zhou, H.; Wang, K. Y.; Zhu, H. X.; Zhuang, L. Z.; Xu, Z.; He, H. *J. Mater. Chem. A* **2022**, *10* (42), 22730-22741.
20. Hui, X. B.; Zhang, P.; Li, J. F.; Zhao, D. Y.; Li, Z. Q.; Zhang, Z. W.; Wang, C. X.; Wang, R. T.; Yin, L. W. *Adv. Energy Mater.* **2022**, *12* (34), 10.
21. Jiang, D. Q.; Wang, H. Y.; Wu, S.; Sun, X. Y.; Li, J. *Small Methods* **2022**, *6* (1), 9.
22. Yang, Y.; Wang, T.; Guo, Y.; Liu, P. G.; Han, X. F.; Wu, D. L. *Mater. Today Chem.* **2023**, *29*, 11.
23. Zuo, Y. Y.; Wang, K. L.; Wei, M. H.; Zhao, S. Y.; Zhang, P. F.; Pei, P. C. *Cell Rep. Phys. Sci.* **2022**, *3* (1), 13.
24. Liu, Q. Q.; Xia, C. F.; He, C. H.; Guo, W.; Wu, Z. P.; Li, Z.; Zhao, Q.; Xia, B. Y. *Angew. Chem.-Int. Edit.* **2022**, *61* (44), 7.
25. Chen, S. M.; Ma, L. T.; Wu, S. L.; Wang, S. Y.; Li, Z. B.; Emmanuel, A. A.; Huqe, M. R.; Zhi, C. Y.; Zapien, J. A. *Adv. Funct. Mater.* **2020**, *30* (10), 9.

26. Peng, W.; Chen, Z.; Jin, J.; Yang, S.; Zhang, J.; Li, G. *ACS Appl. Mater. Interfaces* **2022**, *14* (28), 31792-31802.
27. Lyu, J.; Zhou, Q. Y.; Wang, H. F.; Xiao, Q.; Qiang, Z.; Li, X. P.; Wen, J.; Ye, C. H.; Zhu, M. F. *Adv. Sci.* **2023**, *12*.
28. Chen, Z. H.; Jin, J. H.; Yang, S. L.; Li, G.; Zhang, J. J. *ACS Sustain. Chem. Eng.* **2023**, *11*.
29. Jiao, M. L.; Dai, L. X.; Ren, H. R.; Zhang, M. T.; Xiao, X.; Wang, B. R.; Yang, J. L.; Liu, B. L.; Zhou, G. M.; Cheng, H. M. *Angew. Chem.-Int. Edit.* **2023**, *11*.
